# Supplementary material for: Improved TMC1 gene therapy restores hearing and balance in mice with genetic inner ear disorders
Source: PubMed Central journal article supplement (PMC6342993; doi:10.1038/s41467-018-08264-w), 2019-01-22
Supplement: 41467_2018_8264_MOESM2_ESM.pdf [file 41467_2018_8264_MOESM2_ESM.pdf]

## **Description of Additional Supplementary Files**

File Name: Supplementary Movie 1

Description: Representative open field videos of a C57BL/6 control mouse.

File Name: Supplementary Movie 2

Description: Representative open field video of an uninjected Tmc1 $\Delta/\Delta$ ;Tmc2 $\Delta/\Delta$  mouse.

File Name: Supplementary Movie 3

Description: Representative open field video of a Tmc1 $\Delta/\Delta$ ;Tmc2 $\Delta/\Delta$  mouse injected with sAAV-Tmc1.
